# Supplementary material for: Time-Course Transcriptome Analysis of Gingiva-Derived Mesenchymal Stem Cells Reveals That Fusobacterium nucleatum Triggers Oncogene Expression in the Process of Cell Differentiation
Source: Front Cell Dev Biol. 2020 Jan 14;7:359. doi: 10.3389/fcell.2019.00359 (PMC6970952; doi:10.3389/fcell.2019.00359)
Supplement: TABLE S9 — All the miRNAs and TFs targeting to the five dynamic DEGs (PLCG2, CHI3L2, L3MBTL4, SH2D2A, and NLRP3). [file Table_9.XLSX]

## Sheet: miRNA
Gene	EntrezID	RefseqID	miRNA	MIMATid	miRWalk	Microt4	miRanda	mirbridge	miRDB	miRMap	miRNAMap	Pictar2	PITA	RNA22	RNAhybrid	Targetscan	SUM
CHI3L2	1117	NM_001025199	hsa-miR-1343-3p	MIMAT0019776	0	1	1	0	1	1	0	1	0	0	1	1	7
L3MBTL4	91133	NM_173464	hsa-miR-1200	MIMAT0005863	1	0	1	0	1	1	0	1	1	0	1	1	8
L3MBTL4	91133	XM_005258168	hsa-miR-495-3p	MIMAT0002817	1	1	1	0	0	1	0	0	0	1	1	1	7
L3MBTL4	91133	XM_005258168	hsa-miR-513b-5p	MIMAT0005788	1	1	1	0	0	1	0	0	0	1	1	1	7
L3MBTL4	91133	XM_005258168	hsa-miR-526b-5p	MIMAT0002835	1	1	1	0	0	1	0	0	0	1	1	1	7
L3MBTL4	91133	XM_005258168	hsa-miR-1288-3p	MIMAT0005942	1	1	1	0	0	1	0	0	0	1	1	1	7
L3MBTL4	91133	XM_005258168	hsa-miR-552-3p	MIMAT0003215	1	1	1	0	0	1	0	0	0	1	1	1	7
L3MBTL4	91133	XM_005258168	hsa-miR-581	MIMAT0003246	1	1	1	0	0	1	0	0	0	1	1	1	7
L3MBTL4	91133	XM_005258168	hsa-miR-137	MIMAT0000429	1	1	1	0	0	1	0	0	0	1	1	1	7
L3MBTL4	91133	XM_005258168	hsa-miR-106b-5p	MIMAT0000680	1	1	1	0	0	1	0	0	0	1	1	1	7
L3MBTL4	91133	XM_005258168	hsa-miR-214-3p	MIMAT0000271	1	1	1	0	0	1	0	0	0	1	1	1	7
L3MBTL4	91133	XM_005258168	hsa-miR-30c-1-3p	MIMAT0004674	1	1	1	0	0	1	0	0	0	1	1	1	7
L3MBTL4	91133	XM_005258168	hsa-miR-30c-2-3p	MIMAT0004550	1	1	1	0	0	1	0	0	0	1	1	1	7
L3MBTL4	91133	XM_005258168	hsa-miR-3148	MIMAT0015021	1	1	1	0	0	1	0	0	0	1	1	1	7
L3MBTL4	91133	XM_005258168	hsa-miR-3192-5p	MIMAT0015076	1	1	1	0	0	1	0	0	0	1	1	1	7
L3MBTL4	91133	XM_005258168	hsa-miR-3199	MIMAT0015084	1	1	1	0	0	1	0	0	0	1	1	1	7
L3MBTL4	91133	XM_005258168	hsa-miR-342-3p	MIMAT0000753	1	1	1	0	0	1	0	0	0	1	1	1	7
L3MBTL4	91133	XM_005258168	hsa-miR-3619-5p	MIMAT0017999	1	1	1	0	0	1	0	0	0	1	1	1	7
L3MBTL4	91133	XM_005258168	hsa-miR-3928-3p	MIMAT0018205	1	1	1	0	0	1	0	0	0	1	1	1	7
L3MBTL4	91133	XM_005258168	hsa-miR-4255	MIMAT0016885	1	1	1	0	0	1	0	0	0	1	1	1	7
L3MBTL4	91133	NM_173464	hsa-miR-495-3p	MIMAT0002817	1	0	1	0	1	1	0	0	1	0	1	1	7
L3MBTL4	91133	NM_173464	hsa-miR-522-3p	MIMAT0002868	1	0	1	0	1	1	0	0	1	0	1	1	7
L3MBTL4	91133	NM_173464	hsa-miR-543	MIMAT0004954	1	0	1	0	1	1	0	0	1	0	1	1	7
L3MBTL4	91133	NM_173464	hsa-miR-548c-3p	MIMAT0003285	1	0	1	0	1	1	0	0	1	0	1	1	7
L3MBTL4	91133	NM_173464	hsa-miR-548k	MIMAT0005882	1	0	1	0	1	1	0	0	1	0	1	1	7
L3MBTL4	91133	NM_173464	hsa-miR-613	MIMAT0003281	1	0	1	0	1	1	0	0	1	0	1	1	7
L3MBTL4	91133	NM_173464	hsa-miR-1	MIMAT0000416	1	0	1	0	1	1	0	0	1	0	1	1	7
L3MBTL4	91133	NM_173464	hsa-miR-1303	MIMAT0005891	1	0	1	0	1	1	0	0	1	0	1	1	7
L3MBTL4	91133	NM_173464	hsa-miR-186-5p	MIMAT0000456	1	0	1	0	1	1	0	0	1	0	1	1	7
L3MBTL4	91133	NM_173464	hsa-miR-197-3p	MIMAT0000227	1	0	1	0	1	1	0	0	1	0	1	1	7
L3MBTL4	91133	NM_173464	hsa-miR-202-3p	MIMAT0002811	1	0	1	0	1	1	0	0	1	0	1	1	7
L3MBTL4	91133	NM_173464	hsa-miR-206	MIMAT0000462	1	0	1	0	1	1	0	0	1	0	1	1	7
L3MBTL4	91133	NM_173464	hsa-miR-30a-5p	MIMAT0000087	1	0	1	0	1	1	0	0	1	0	1	1	7
L3MBTL4	91133	NM_173464	hsa-miR-30b-5p	MIMAT0000420	1	0	1	0	1	1	0	0	1	0	1	1	7
L3MBTL4	91133	NM_173464	hsa-miR-30c-5p	MIMAT0000244	1	0	1	0	1	1	0	0	1	0	1	1	7
L3MBTL4	91133	NM_173464	hsa-miR-30d-5p	MIMAT0000245	1	0	1	0	1	1	0	0	1	0	1	1	7
L3MBTL4	91133	NM_173464	hsa-miR-30e-5p	MIMAT0000692	1	0	1	0	1	1	0	0	1	0	1	1	7
NLRP3	114548	XM_005273036	hsa-miR-520f-3p	MIMAT0002830	1	1	1	0	0	1	0	0	0	1	1	1	7
NLRP3	114548	XM_005273036	hsa-miR-372-3p	MIMAT0000724	1	1	1	0	0	1	0	0	0	1	1	1	7
PLCG2	5336	NM_002661	hsa-miR-382-5p	MIMAT0000737	1	0	1	0	0	1	1	0	1	1	1	1	8
PLCG2	5336	NM_002661	hsa-miR-603	MIMAT0003271	1	0	0	0	0	1	1	0	1	1	1	1	7
PLCG2	5336	NM_002661	hsa-miR-186-5p	MIMAT0000456	1	0	1	0	1	1	0	0	1	0	1	1	7
PLCG2	5336	NM_002661	hsa-miR-193a-5p	MIMAT0004614	1	0	1	0	0	1	0	0	1	1	1	1	7
PLCG2	5336	NM_002661	hsa-miR-4259	MIMAT0016880	1	0	1	0	1	1	0	0	0	1	1	1	7
SH2D2A	9047	NM_001161441	hsa-miR-4459	MIMAT0018981	1	1	1	0	0	1	0	1	0	0	1	1	7
SH2D2A	9047	NM_001161441	hsa-miR-665	MIMAT0004952	1	1	1	0	0	1	0	0	0	1	1	1	7
SH2D2A	9047	NM_001161441	hsa-miR-765	MIMAT0003945	1	1	1	0	0	1	0	0	0	1	1	1	7
SH2D2A	9047	NM_001161441	hsa-miR-3065-5p	MIMAT0015066	1	1	1	0	1	1	0	0	0	0	1	1	7
SH2D2A	9047	NM_001161441	hsa-miR-3155a	MIMAT0015029	1	1	1	0	0	1	0	0	0	1	1	1	7
SH2D2A	9047	NM_001161441	hsa-miR-3918	MIMAT0018192	1	1	1	0	0	1	0	0	0	1	1	1	7
SH2D2A	9047	NM_001161441	hsa-miR-4290	MIMAT0016921	1	1	1	0	0	1	0	0	0	1	1	1	7

## Sheet: TF
; Name	Sheet1
; Species and nomenclature	Homo sapiens, HGNC symbols
; Motif collection	10K (9713 PWMs)
; Track collection	1120 ChIP-seq tracks (ENCODE raw signals)
; Minimum NEScore	3
; Rank threshold for visualization	5000
; ROC threshold for AUC calculation (%)	0.03
; Minimum identity between orthologous genes	0.05
; Maximum false discovery rate (FDR) on motif similarity	0.001
; Motif rankings database	20kb centered around TSS (7 species)
; Track rankings database	20kb centered around TSS (ChIP-seq-derived)
; Number of valid nodes	5
; iRegulon version	iRegulon v1.3 (build: 2015-02-12)
# Rank	Motif id	AUC	NES	ClusterCode	Transcription factor	Target genes
1	transfac_pro-M01584	0.335725	11.4573	M1	TAF9	PLCG2,NLRP3
2	encode-UW.Motif.0299	0.320179	10.9152	M2		L3MBTL4,SH2D2A
3	yetfasco-1874	0.317489	10.8214	M3		NLRP3,SH2D2A
4	stark-TCCTNNNNNNNGGA	0.309716	10.5503	M4		L3MBTL4,NLRP3
5	transfac_pro-M00707	0.266667	9.04909	M5	GTF2A1,GTF2A2	L3MBTL4,NLRP3
6	yetfasco-1852	0.253513	8.59038	M6		L3MBTL4,PLCG2,SH2D2A,CHI3L2
7	tfdimers-MD00406	0.247235	8.37145	M7	NEUROD1,TFAP4,MYCN,NFIX,YY1,MEF2A,MEF2D,MEF2C,MEF2B,MEF2BNB-MEF2B	SH2D2A,PLCG2
8	elemento-CCTTGTAG	0.236472	7.99613	M8		SH2D2A,L3MBTL4
9	transfac_pro-M00367	0.222123	7.49572	M1	CREB3L1,USF2,USF1,MYC,MAX,ARNT2,BHLHE40,ARNT,ATF3,MYCN,CREB3L2	PLCG2,NLRP3
10	transfac_public-M00356	0.219133	7.39146	M1	CREB3,XBP1,CREB3L1,ATF6,ATF6B,CREB3L2	NLRP3,PLCG2
11	yetfasco-1705	0.208072	7.00573	M9		CHI3L2,NLRP3,L3MBTL4
12	taipale-TGCCACGTCATCA-Creb3l2-DBD	0.200897	6.75552	M1	TAF9,CREB3L1,CREB3,XBP1,ATF6,ATF6B,CREB3L2	NLRP3,PLCG2
13	encode-UW.Motif.0072	0.199701	6.71382	M10		SH2D2A
14	tfdimers-MD00264	0.199103	6.69297	M11	RFX1,NR3C1,CHURC1,MAF,HSF1,NR2F2,NR2F1,PGR,ZFP42,TCF3,TAL1	SH2D2A
15	tfdimers-MD00385	0.197608	6.64084	M12	POU2F1,POU2F2,POU5F1,POU5F1B,POU2AF1,POU3F1,POU2F3,POU3F2,POU3F3,POU4F1,E2F1	PLCG2
16	homer-M00677	0.19701	6.61999	M10	ELF2,ELF1,ELF4	SH2D2A
17	yetfasco-1404	0.192526	6.46361	M4		PLCG2
18	tfdimers-MD00575	0.191031	6.41148	M13	HMGA2,HMGA1,SOX17,ETV7,GABPB1,ETV6,ELF2,ELF4,SPIB,SOX4,ELK4,ELK1,FLI1	PLCG2
19	tfdimers-MD00064	0.190732	6.40106	M14	E2F1,LTF	PLCG2
20	tfdimers-MD00532	0.189836	6.36978	M15	FOXO1,POU5F1,NANOG,FOXO4,FOXP3,FOXA3,FOXA1,SMAD1,FOXG1	PLCG2
21	yetfasco-1036	0.189238	6.34893	M16		L3MBTL4
22	encode-UW.Motif.0454	0.188939	6.3385	M17		L3MBTL4
23	encode-UW.Motif.0608	0.187743	6.2968	M2		SH2D2A
24	encode-UW.Motif.0196	0.187145	6.27595	M10		SH2D2A
25	yetfasco-1883	0.186248	6.24468	M7		CHI3L2
26	transfac_public-M00270	0.185949	6.23425	M18	GCM1,GCM2	L3MBTL4
27	elemento-ACATGGC	0.18565	6.22383	M19		NLRP3
28	transfac_public-M00065	0.184753	6.19255	M11	TAL1,TCF3,TCF4,YY1,MYB,TCF12,NEUROD1,ZNF146,ZNF260	SH2D2A
29	transfac_pro-M02934	0.184454	6.18212	M20		SH2D2A
30	transfac_public-M00047	0.183558	6.15085	M21		SH2D2A
31	tfdimers-MD00161	0.18296	6.13	M14	JUN,IRF1,FOS,IRF8,IRF7,IRF6,IRF3,IRF4,IRF2,IRF5,E2F1,FOXM1,IRF9	NLRP3
32	transfac_pro-M01572	0.18296	6.13	M18		PLCG2
33	yetfasco-868	0.18296	6.13	M18		PLCG2
34	jaspar-CN0075.1	0.182063	6.09872	M12		PLCG2
35	yetfasco-1919	0.182063	6.09872	M7		L3MBTL4,CHI3L2
36	elemento-AGCACCT	0.181764	6.0883	M22		PLCG2
37	encode-UW.Motif.0334	0.181465	6.07787	M23		NLRP3
38	taipale-NTGCCACGTCANCA-CREB3L1-full	0.179671	6.01532	M1	CREB3L1,CREB3,XBP1,ATF6,ATF6B,CREB3L2	NLRP3,PLCG2
39	transfac_public-M00076	0.179073	5.99447	M9	GATA2,GATA1	L3MBTL4
40	yetfasco-1738	0.179073	5.99447	M24		L3MBTL4
41	swissregulon-FOXD3.p2	0.17728	5.93192	M15	FOXD3,RRN3,FOXJ1,FOXF1,FOXH1,FOXF2,FOXJ2,FOXI1,FOXA2,FOXL1,CEBPD,CEBPB,CEBPA,CEBPE,CEBPG,SMAD1,FOXA1,FOXA3,FOXC2,NF1,FOXO1,HMGA2,HMGA1,FOXP3,HLTF,FOXC1,FOXO6,FOXM1	PLCG2,NLRP3,L3MBTL4
42	yetfasco-1164	0.176682	5.91107	M25		L3MBTL4
43	elemento-CAGCTTC	0.176383	5.90064	M26		L3MBTL4
44	homer-M00051	0.176383	5.90064	M27	RUNX1,FLI1,ING4,ZNF354C,ETS1,GLI3,ZBTB14,ELF5	CHI3L2,NLRP3,PLCG2
45	yetfasco-1868	0.176383	5.90064	M7		PLCG2
46	taipale-TGAATANCATTCA-SRY-DBD	0.175486	5.86936	M28	SRY,SOX14,SOX2,SOX21,SOX15,SOX18	NLRP3
47	yetfasco-643	0.174888	5.84851	M29	MLXIPL,USF1,TFE3,ARNT,BHLHE40,TFEB,USF2,SREBF2,MLX,SREBF1,TFEC,BHLHE41,ATF3,MYC,MAX,ARNT2,HELT	PLCG2,NLRP3
48	hdpi-LRRFIP1	0.17429	5.82766	M25	LRRFIP1	L3MBTL4
49	jaspar-CN0114.1	0.17429	5.82766	M30		CHI3L2
50	flyfactorsurvey-peb-F1-3_SOLEXA_FBgn0003053	0.172795	5.77554	M6	RREB1	L3MBTL4
51	taipale-NNNGMCACGTCATC-XBP1-DBD	0.172795	5.77554	M31	XBP1,CREB3,CREB3L1,ATF6B,CREB3L2	NLRP3
52	yetfasco-2077	0.172795	5.77554	M32		L3MBTL4
53	jaspar-CN0046.1	0.172197	5.75469	M33	MSC,MYF5,TCF12	L3MBTL4
54	yetfasco-1078	0.172197	5.75469	M34		NLRP3
55	transfac_pro-M00654	0.171898	5.74426	M35		NLRP3
56	transfac_pro-M01848	0.171599	5.73383	M36		L3MBTL4
57	factorbook-SREBF1	0.170105	5.68171	M37	SREBF1,SREBF2	NLRP3
58	transfac_pro-M01818	0.169806	5.67128	M31	TAF9,CREB3	NLRP3
59	taipale-NTGCCACGTCAYCN-CREB3-full	0.169208	5.65043	M1	CREB3,CREB3L1,XBP1,ATF6,ATF6B,CREB3L2	NLRP3,PLCG2
60	transfac_pro-M00700	0.16861	5.62958	M1		NLRP3
61	transfac_public-M00066	0.16861	5.62958	M11	TCF3,TAL1,TCF4,MYB,YY1,NEUROD1,TCF12,ATOH1,OLIG2,RFX1,NR3C1,ZNF146,ZNF260,ATOH7	SH2D2A
62	yetfasco-1824	0.168311	5.61916	M38		NLRP3
63	tiffin-TIFDMEM0000021	0.168012	5.60873	M39		PLCG2
64	transfac_pro-M00369	0.168012	5.60873	M1	CREB3L1,BHLHE40,USF1,MYC,ARNT2,MAX,ARNT,USF2,ATF3,MXI1,MYCN,TFE3,MNT,CREB3L2	PLCG2,NLRP3
65	transfac_pro-M00370	0.168012	5.60873	M1	USF2,USF1,ARNT2,BHLHE40,MAX,MYC,ARNT,ATF3,TFE3,CREB3L1,TFEB,CREB3L2	PLCG2,NLRP3
66	homer-M01851	0.167713	5.59831	M40	PRDM2,PRDM1	PLCG2
67	yetfasco-1655	0.167414	5.58788	M29	ARNTL2	NLRP3
68	elemento-ATCATGCG	0.167115	5.57745	M41		NLRP3,PLCG2,L3MBTL4
69	yetfasco-929	0.166517	5.5566	M42		L3MBTL4
70	flyfactorsurvey-CG10904_SANGER_5_FBgn0034945	0.165919	5.53575	M43		NLRP3
71	swissregulon-ATF6.p2	0.165919	5.53575	M1	ATF6,CREB3,CREB3L1,ATF6B	NLRP3
72	elemento-GCCAAGGC	0.16562	5.52533	M44		L3MBTL4
73	selexconsensus-bin	0.164425	5.48363	M45	FOXF2,FOXF1,FOXL1,FOXL2,FOXQ1	PLCG2
74	transfac_public-M00117	0.164425	5.48363	M46	CEBPB,CEBPA,CEBPG,CEBPD,CEBPE,NR3C1	NLRP3
75	tfdimers-MD00019	0.162332	5.41065	M47	PAX4,MYB,TLX2,POU1F1,HNF1A,RAX,PDX1,NOBOX,CRX,HOXC6,DBX1	SH2D2A,L3MBTL4,PLCG2,CHI3L2
76	transfac_pro-M00374	0.162332	5.41065	M48		NLRP3
77	stark-MACTTGTYR	0.161734	5.3898	M49		L3MBTL4
78	jaspar-CN0076.1	0.161435	5.37937	M12		PLCG2
79	yetfasco-698	0.161435	5.37937	M40	PRDM2,ZNF683,PRDM1,IRF7,IRF6,POU5F1,IRF5,IRF4,IRF2,TGIF1,TGIF2,TGIF2LX,TGIF2LY,MEF2A,MEF2D,MEF2C,MEF2BNB-MEF2B,MEF2B	PLCG2
80	encode-UW.Motif.0256	0.161136	5.36895	M50		PLCG2
81	yetfasco-415	0.160837	5.35852	M40	PRDM2,ZNF683,PRDM1,IRF2,POU5F1,IRF7,IRF5,IRF6,IRF4,TGIF1,TGIF2,TGIF2LX,TGIF2LY,MEF2A,MEF2C,MEF2D,MEF2B,MEF2BNB-MEF2B	PLCG2
82	hdpi-GOT1	0.160538	5.3481	M51	GOT1	NLRP3
83	elemento-AGGATGC	0.15994	5.32725	M6		L3MBTL4
84	elemento-CCATGTC	0.15994	5.32725	M48		NLRP3
85	flyfactorsurvey-HLH106_SANGER_5_1_FBgn0015234	0.159641	5.31682	M37	TFEB,SREBF2,BHLHE41,SREBF1,MLX,ARNT,TFEC,ARNTL,HELT	NLRP3
86	encode-UW.Motif.0475	0.159342	5.3064	M27		PLCG2
87	tfdimers-MD00372	0.159342	5.3064	M52	PITX3	L3MBTL4
88	tfdimers-MD00506	0.159342	5.3064	M53	GATA1,PURA,E2F1,CRX	PLCG2
89	yetfasco-1020	0.159043	5.29597	M29	SREBF1,MLXIPL,USF1,ARNT,MLX,BHLHE40,SREBF2,TFE3	NLRP3
90	yetfasco-1022	0.158744	5.28555	M31	USF1,ARNT,BHLHE40,SREBF1	NLRP3
91	jaspar-MA0041.1	0.158146	5.26469	M15	FOXD3,RRN3,FOXF1,FOXH1,FOXJ1,FOXF2,FOXA2,FOXJ2,FOXI1,FOXA1,FOXA3,FOXO3,FOXO6,FOXM1	PLCG2,L3MBTL4
92	stark-MATTWRTCA	0.158146	5.26469	M47		PLCG2
93	taipale-RTAAACATMAACA-Foxj3-DBD	0.15725	5.23342	M39	FOXJ2,FOXJ3,FOXP3,FOXD2,FOXO1,FOXO4,FOXL1,FOXO6	PLCG2,L3MBTL4,NLRP3
94	taipale-TAATYRATTA-PAX7-full	0.15725	5.23342	M54	PAX7,PAX3	L3MBTL4
95	flyfactorsurvey-HLH106_SANGER_5_3_FBgn0015234	0.156054	5.19172	M37	SREBF2	NLRP3
96	jaspar-MA0128.1	0.155456	5.17087	M1		PLCG2,NLRP3
97	yetfasco-1865	0.155456	5.17087	M7		NLRP3,CHI3L2
98	elemento-CATCATG	0.153961	5.11874	M41		NLRP3
99	taipale-NGACCCCCCACGANGN-GLIS1-DBD	0.153961	5.11874	M55	GLIS1,GLIS3,GLIS2	PLCG2
100	jaspar-CN0203.1	0.153662	5.10831	M56		CHI3L2
101	transfac_pro-M01214	0.153363	5.09789	M32	ELF3	SH2D2A,L3MBTL4
102	transfac_public-M00075	0.153064	5.08746	M9	GATA1,GATA2	L3MBTL4
103	homer-M00702	0.152765	5.07704	M57		NLRP3
104	jaspar-CN0006.1	0.152167	5.05619	M58		SH2D2A
105	jaspar-PF0064.1	0.15157	5.03534	M47		PLCG2,L3MBTL4
106	yetfasco-1499	0.15157	5.03534	M29	SREBF1,SREBF2,TFEC,TFEB,ARNT,MLX,USF1,TFE3,MLXIPL,BHLHE41,ATF3,BHLHE40	NLRP3
107	factorbook-CEBPB	0.151271	5.02491	M46	CEBPB,CEBPE,CEBPG,CEBPA,CEBPD,ATF4,DDIT3,NFIL3	NLRP3
108	transfac_pro-M00401	0.151271	5.02491	M1	CREB3,CREB3L1,XBP1,ATF6B,CREB3L2	NLRP3
109	transfac_public-M00274	0.151271	5.02491	M59	SOX4,NANOG	CHI3L2,L3MBTL4,PLCG2,NLRP3
110	homer-M00245	0.150673	5.00406	M60		PLCG2
111	swissregulon-ONECUT1-2.p2	0.150673	5.00406	M61	ONECUT2,ONECUT1,ONECUT3	PLCG2
112	yetfasco-1295	0.150673	5.00406	M62		PLCG2
113	transfac_pro-M01779	0.149776	4.97278	M29	USF2,USF1,SREBF1,TFEC,TFEB,MLX	PLCG2,NLRP3
114	hdpi-TBPL1	0.149477	4.96236	M63	TBPL1,HOXA6,HOXB6,HOXA7,HOXB7,LHX9,HOXC8,HOXD8	L3MBTL4
115	tfdimers-MD00089	0.149477	4.96236	M64	STAT6,E2F1,TCF3,IRF1,E2F6,EP300,IKZF1,CEBPB,ETS1,PURA	NLRP3
116	taipale-NTGCCACGTCANCA-CREB3L1-DBD	0.148879	4.94151	M1	CREB3L1,CREB3,XBP1,ATF6B,CREB3L2	NLRP3,PLCG2
117	flyfactorsurvey-sens-2_SANGER_2.5_FBgn0051632	0.14858	4.93108	M17	GFI1,GFI1B	L3MBTL4
118	transfac_pro-M01005	0.14858	4.93108	M59		L3MBTL4
119	homer-M00598	0.148281	4.92066	M17	FOXF2,FOXF1,FOXL1,FOXL2,FOXQ1	L3MBTL4
120	transfac_pro-M00697	0.147982	4.91023	M3	E4F1	NLRP3,PLCG2
121	transfac_pro-M02278	0.147982	4.91023	M10	SPI1,ETV6,ETV4,ETS1,ETS2,ERG,FLI1,ETV7,ELF1,ELF4,SPIB,ELK4,GABPA,ELK1,ELF2,GABPB1,ELK3	SH2D2A
122	transfac_pro-M00819	0.147683	4.89981	M9		PLCG2,NLRP3
123	transfac_pro-M01812	0.147683	4.89981	M9		NLRP3
124	factorbook-CREB	0.147085	4.87896	M3	ATF3,ATF4,CREM,CREB1	NLRP3
125	homer-M00049	0.147085	4.87896	M32	ETS1,ELK1,ETV1,GATA1,GATA5,GATA6,GATA2,GATA4,GATA3,ETS2,ERG,GABPA	SH2D2A
126	homer-M00859	0.147085	4.87896	M9		PLCG2,NLRP3
127	transfac_pro-M00443	0.147085	4.87896	M31		NLRP3
128	transfac_public-M00130	0.147085	4.87896	M15	RRN3,FOXD3,FOXH1,FOXF2,FOXF1,FOXJ1,FOXA2,FOXJ2,FOXA3,FOXA1,FOXI1,FOXO3,FOXO6,FOXM1	PLCG2
129	tiffin-TIFDMEM0000109	0.146786	4.86853	M33		L3MBTL4
130	transfac_public-M00212	0.146786	4.86853	M65		L3MBTL4
131	stark-RTAAATA	0.146188	4.84768	M45	FOXF1,FOXF2,FOXL1,FOXQ1,FOXL2	PLCG2,L3MBTL4
132	yetfasco-1322	0.145889	4.83726	M2	HSF2	PLCG2
133	homer-M00019	0.14559	4.82683	M46	CEBPE,CEBPG,CEBPB,CEBPD	NLRP3,CHI3L2
134	homer-M01746	0.145291	4.8164	M66		PLCG2
135	flyfactorsurvey-fd64A_SANGER_5_FBgn0004895	0.144993	4.80598	M15		L3MBTL4
136	transfac_public-M00136	0.144993	4.80598	M52	POU2F1,POU2F3,POU5F1B,POU2F2	L3MBTL4
137	tfdimers-MD00440	0.144395	4.78513	M15	FOXI1,IRF1,PGR,FOXA3,NR3C1,SMAD1,FOXA1,FOXA2,FOXC2,HLTF,NANOG,FOXO4,FOXJ2,FOXF1,FOXJ1,FOXD3,RRN3,FOXH1,FOXF2,HSF1,FOXP3	L3MBTL4
138	transfac_pro-M00936	0.144395	4.78513	M3	E4F1	NLRP3,PLCG2
139	taipale-TAATYRATTA-PAX3-DBD	0.143797	4.76428	M54	PAX3,PAX7	L3MBTL4
140	transfac_pro-M00946	0.143797	4.76428	M1	ATF3,USF1,ARNTL,USF2,BHLHE41,TFEB,SREBF2,SREBF1,ATF1,CREB3L2	PLCG2,NLRP3
141	homer-M01760	0.143498	4.75385	M3		NLRP3
142	transfac_public-M00251	0.143498	4.75385	M31	XBP1,CREB3,CREB3L1,MYC,MAX,ARNT	NLRP3
143	swissregulon-XBP1.p3	0.142003	4.70173	M31	XBP1,CREB3	NLRP3
144	taipale-NTTRCGCAAY-CEBPE-DBD	0.142003	4.70173	M46	CEBPE,CEBPB,CEBPD,CEBPG	NLRP3
145	transfac_pro-M02076	0.142003	4.70173	M32	SPIB,SPIC,SPI1,EHF,ELF3,NFATC3,ELF5,FLI1,ETV6	SH2D2A,L3MBTL4
146	tfdimers-MD00104	0.141704	4.6913	M13	ELK4,ELF2,FLI1,ELK1,GABPB1,SOX4,ETV7,ETV6,SPIB,ELF4,HMGA1,SOX17,HMGA2,SOX3,ETS1	PLCG2,L3MBTL4,NLRP3,CHI3L2
147	hdpi-ZHX3	0.141405	4.68088	M67	ZHX3	PLCG2
148	transfac_pro-M01770	0.141405	4.68088	M31	XBP1,CREB3	NLRP3
149	taipale-RAANCGAAAWTCGNTTY-IRF7-DBD	0.141106	4.67045	M68	IRF7	PLCG2
150	yetfasco-666	0.141106	4.67045	M66	MEF2A,MEF2D,MEF2C,MEF2BNB-MEF2B,MEF2B	PLCG2
151	yetfasco-1846	0.140508	4.6496	M69		PLCG2
152	taipale-AGGTGTGAAWTTCACACCT-TBX1-DBD	0.140209	4.63917	M70	TBX1,TBX15,TBX20,TBX18,TBX22,EOMES,TBR1,MGA,TBX21,TBX2,TBX6	NLRP3
153	transfac_pro-M00337	0.140209	4.63917	M32		L3MBTL4,PLCG2
154	tfdimers-MD00296	0.13991	4.62875	M2	MYB,ZEB1	PLCG2
155	taipale-NTTRCGCAAY-CEBPB-DBD	0.139611	4.61832	M46	CEBPB,CEBPE,CEBPD,CEBPG	NLRP3
156	elemento-AGATCATG	0.139013	4.59747	M71		NLRP3
157	taipale-AAGGTCANNNNAAGGTCA-ESRRG-full	0.139013	4.59747	M72	ESRRG,ESRRA,RARG,RARA,RORA,NR5A2,RXRA,ESRRB,NR5A1	SH2D2A
158	transfac_public-M00030	0.139013	4.59747	M28		NLRP3
159	flyfactorsurvey-CG8319_SANGER_2.5_FBgn0037722	0.138714	4.58705	M73	ZNF146,ZNF260,RXRA	L3MBTL4
160	hdpi-HCLS1	0.138714	4.58705	M19	HCLS1	NLRP3
161	transfac_pro-M01558	0.138714	4.58705	M29	ARNT,MYC,MAX,TFEB,SREBF1,SREBF2,TFEC,USF1,MLX,MLXIPL,ATF3,BHLHE41,TFE3,BHLHE40,USF2,ARNTL	NLRP3
162	yetfasco-795	0.138714	4.58705	M29	ARNT,MYC,MAX,TFEB,SREBF1,SREBF2,TFEC,USF1,MLX,MLXIPL,ATF3,BHLHE41,TFE3,BHLHE40,USF2,ARNTL	NLRP3
163	yetfasco-1837	0.138416	4.57662	M74		L3MBTL4
164	transfac_pro-M00943	0.138117	4.5662	M1	USF1,USF2,ARNT2,MYC,BHLHE40,MAX,ARNT,MXI1,CREB3L1,MYCN,ATF3,MNT,TFE3	PLCG2,NLRP3
165	stark-TAATTRANNTTNATG	0.137519	4.54535	M75	PDX1	L3MBTL4,SH2D2A,NLRP3
166	transfac_public-M00062	0.137519	4.54535	M14	IRF1,IRF2,IRF7	L3MBTL4,NLRP3
167	encode-UW.Motif.0128	0.136921	4.5245	M65		L3MBTL4
168	jaspar-PF0119.1	0.136323	4.50364	M76		SH2D2A
169	swissregulon-EP300.p2	0.136323	4.50364	M27	EP300,PURA	PLCG2
170	taipale-GACCCCCCGCGNNG-GLIS2-DBD	0.135725	4.48279	M55	GLIS2,GLIS3,GLIS1,ZIC4,ZIC3,GLI2,ZIC1,ZIC5,ZIC2	PLCG2,SH2D2A,L3MBTL4
171	transfac_pro-M01197	0.13423	4.43067	M32	ELF5,NFATC3,ETV4,ETS1,EHF,ELF3	L3MBTL4
172	flyfactorsurvey-CrebA_SANGER_5_FBgn0004396	0.133931	4.42024	M1	CREB3L1,CREB3L2,CREB3,XBP1,MAX,USF1,ARNT,ARNT2,BHLHE40,MYC,ATF3,ATF6B	NLRP3,PLCG2
173	iDMMPMM-USP	0.133931	4.42024	M73	RXRA,RXRG,RXRB	PLCG2
174	transfac_pro-M00514	0.133931	4.42024	M3	ATF4,ATF3,CREB1,CREM,ATF5,ATF2,ATF1,ATF6,ATF7	NLRP3
175	transfac_pro-M02775	0.133931	4.42024	M77	MAFB,MAFF,MAFK,MAF,NRL,DBP,MAFG	L3MBTL4
176	transfac_public-M00168	0.133931	4.42024	M78	HSF1,HSF2,HSF4,NR3C1	NLRP3,PLCG2,L3MBTL4
177	transfac_public-M00483	0.133931	4.42024	M1	ATF6,CREB3,CREB3L1,ATF6B	NLRP3
178	transfac_pro-M01450	0.133034	4.38897	M53	PITX1,IKZF2,HNF1A,PITX3,OTX1,OTX2,PITX2,CRX	L3MBTL4
179	taipale-AAAAGTCAA-NR2E1-full	0.132436	4.36812	M61	NR2E1	L3MBTL4
180	encode-UW.Motif.0357	0.132138	4.35769	M65		PLCG2
181	swissregulon-FOX_I1-J2_.p2	0.132138	4.35769	M15	FOXJ2,FOXI1,FOXD3,CEBPD,FOXL1,CEBPE,CEBPG,CEBPB,CEBPA,FOXJ1,RRN3,FOXH1,FOXF2,FOXF1,HMGA1,HMGA2,FOXO1,SMAD1,FOXA1,FOXC2,NF1	PLCG2
182	homer-M00026	0.131839	4.34726	M7		NLRP3
183	hdpi-PURG	0.13154	4.33684	M79	PURG	SH2D2A
184	transfac_pro-M01893	0.13154	4.33684	M31		NLRP3
185	flyfactorsurvey-disco_SANGER_5_FBgn0000459	0.131241	4.32641	M80	BNC2,BNC1	L3MBTL4
186	taipale-GTAAAYAAACA-Foxc1-DBD	0.131241	4.32641	M15	FOXC1,FOXL1,FOXC2,FOXI1,CEBPA,CEBPB,CEBPG,CEBPD,CEBPE,FOXD3,FOXJ2,FOXF2,FOXJ1,FOXH1,FOXF1,RRN3	PLCG2
187	transfac_pro-M01172	0.131241	4.32641	M32	SPI1,E2F1,ETS1,PURA,IRF4,ETV7,GABPB1,TCF4,ELK4,SPIB,ELK1,FLI1,ETV6,ELF4,ELF2,E2F6,EP300,SPIC,MYB,SIRT6,GATA2,GATA3,GATA4,GATA5,GATA1,GATA6,ELF1,TBP,YY1,ELF5,NFATC3,SRY,BPTF,STAT6	NLRP3
188	elemento-TCATGTC	0.130045	4.28471	M48		NLRP3,PLCG2
189	elemento-TCCTTGC	0.130045	4.28471	M81		SH2D2A
190	homer-M00125	0.129746	4.27429	M57	NKX2-5	NLRP3
191	tfdimers-MD00060	0.129746	4.27429	M75	ZNF333,CRX	L3MBTL4
192	tfdimers-MD00195	0.129746	4.27429	M15	FOXO1,CDX2,FOXO4,NANOG,FOXA1,FOXA3,FOXA2	PLCG2
193	transfac_pro-M01330	0.129746	4.27429	M82	HOXB3,EVX1,HOXD1,EMX2,EN2,LHX2,PAX4,ESX1,RAX,PAX7,GBX2,LHX6,PDX1,VAX2,HOXA3,SHOX2,ISX,ALX1,MSX1,GSX2,LHX8,VSX2,MNX1,DBP,HOXA1,PHOX2A,LHX3,EN1,NOBOX,EMX1,PRRX1,BARX1,LHX4,HOXA5,IRF6,TCF3,VSX1,POU3F2,BARX2,GBX1,HOXA2,NOTO,DLX1,DLX5,ALX3,POU2F1,HOXB5,MEOX1,HOXC5,HOXD3,MSX2,VAX1,EVX2,PAX6,PITX3,NKX6-1,HOXB2,POU6F2,LBX2,YY1,DLX2,BARHL1,HOXD8,HOXC8,POU3F4,GSX1,HOXB4,HESX1,PHOX2B,POU1F1,POU4F3,HOXA6,MEO…	NLRP3
194	jaspar-PF0060.1	0.129447	4.26386	M74	FOXO4	PLCG2
195	hdpi-KIF22	0.129148	4.25344	M83	KIF22	CHI3L2,L3MBTL4,NLRP3
196	yetfasco-990	0.129148	4.25344	M84		SH2D2A
197	hdpi-DLX6	0.128849	4.24301	M85	DLX6	PLCG2
198	transfac_pro-M01694	0.128849	4.24301	M18	YY2,YY1,IRF4	CHI3L2
199	transfac_pro-M01973	0.128849	4.24301	M5	PLAG1	SH2D2A
200	stark-GAGGAAGC	0.128251	4.22216	M32		L3MBTL4,NLRP3
201	elemento-AATAAAT	0.127952	4.21174	M42		PLCG2
202	yetfasco-1403	0.127952	4.21174	M4		PLCG2
203	encode-UW.Motif.0459	0.127055	4.18046	M86		PLCG2
204	flyfactorsurvey-HLH106_SANGER_5_2_FBgn0015234	0.127055	4.18046	M29	SREBF2,TFEB,TFEC,SREBF1,MLX,MLXIPL,USF1,TFE3,ARNT,BHLHE41,BHLHE40,ATF3,ARNTL,USF2,HELT	NLRP3
205	transfac_pro-M02870	0.127055	4.18046	M68		SH2D2A
206	yetfasco-1147	0.127055	4.18046	M87		PLCG2
207	transfac_pro-M00808	0.126756	4.17003	M56	PAX3,PAX5,PAX6,PAX4,PAX8,PAX1,PAX2	PLCG2,NLRP3
208	yetfasco-2238	0.125561	4.12833	M29	USF1,TFEC,TFE3,TFEB,MLXIPL,SREBF1,USF2,SREBF2,MLX,ARNT,MYC,MAX,ATF3,BHLHE41,BHLHE40,ARNT2	NLRP3
209	yetfasco-413	0.125262	4.11791	M88		NLRP3
210	jaspar-CN0011.1	0.124963	4.10748	M77		NLRP3
211	stark-TGTCAMNTGCA	0.124664	4.09706	M89		PLCG2
212	wolfe-lmd-F3-5_SOLEXA_5	0.124365	4.08663	M90	GLIS1,GLIS3,MFSD6L	PLCG2
213	elemento-TACGAGGA	0.123169	4.04493	M91		L3MBTL4
214	encode-UW.Motif.0479	0.123169	4.04493	M86		NLRP3,SH2D2A
215	transfac_pro-M02043	0.123169	4.04493	M32	SPI1,SPIC,SPIB,FLI1,EHF,ETV2,ELF3,ELF5,NFATC3,ETS1,ETV1,ETV4,ETV5,ELK1,ERG,ELK4,GABPB1,ETS2,GABPA,ETV6,ELK3,ELF2,ETV7,ELF1,ELF4,ERF,FEV,ETV3,SRY,TCF4,STAT6	SH2D2A,L3MBTL4
216	transfac_pro-M01236	0.12287	4.0345	M92	PDX1	PLCG2
217	homer-M01518	0.122571	4.02408	M93		PLCG2
218	taipale-ANRTAAAYAAACA-FOXC1-DBD	0.122571	4.02408	M15	FOXC1,FOXC2,FOXL1,FOXJ2,CEBPE,CEBPA,CEBPD,CEBPB,CEBPG,FOXP3,FOXA3,FOXI1,FOXD3,FOXA1,HLTF	PLCG2
219	yetfasco-1706	0.122272	4.01365	M9		CHI3L2,NLRP3,L3MBTL4
220	encode-UW.Motif.0265	0.121076	3.97195	M80		L3MBTL4
221	yetfasco-1107	0.120777	3.96153	M51		NLRP3
222	tfdimers-MD00290	0.120478	3.9511	M32	NR3C1,STAT1,ETS2,ETS1,PURA,ETV7,ELF1,ERF,ELF2,ERG,ELK1,FLI1,ELK4,GATA6,GATA3,GATA2,GATA4,GATA1,GATA5,GABPB1,SPZ1	PLCG2,CHI3L2
223	transfac_pro-M03827	0.11988	3.93025	M15	FOXA1,FOXA2,FOXA3,SMAD1,MAF,FOXO1,PGR,NR3C1,NF1,FOXI1,IRF1,HMGA1,HMGA2,FOXH1,FOXF2,RRN3,FOXF1,FOXJ1,FOXD3,TFAP4,FOXP3,HSF1	PLCG2,L3MBTL4
224	flyfactorsurvey-Mio_bigmax_SANGER_5_FBgn0039509	0.119581	3.91983	M29	MLX,MLXIPL,SREBF2,BHLHE40,USF1,SREBF1,TFE3,ARNT,TFEB	PLCG2,NLRP3
225	transfac_pro-M00788	0.119283	3.9094	M1		NLRP3,PLCG2
226	yetfasco-668	0.119283	3.9094	M3		NLRP3
227	yetfasco-777	0.119283	3.9094	M47	TLX2,POU1F1,DBX1	L3MBTL4
228	jaspar-PF0147.1	0.118984	3.89898	M94		L3MBTL4
229	elemento-ATCATGC	0.118386	3.87812	M41		NLRP3,L3MBTL4
230	encode-UW.Motif.0592	0.117788	3.85727	M23		NLRP3
231	transfac_pro-M03064	0.117788	3.85727	M53	PITX1,PITX3,OTX1,OTX2,PITX2,CRX,MZF1	L3MBTL4
232	transfac_pro-M00366	0.117489	3.84685	M1	CREB3L1,USF2,USF1,ARNT,BHLHE40,MYC,ARNT2,MAX,MYCN	PLCG2,NLRP3
233	transfac_pro-M01870	0.117489	3.84685	M10	ETS1,ELK4,ELF2,ETV6,ELF1,SPI1,ETS2,GABPB1,SPIB,ERG,GABPA,ELF4,ELK3,ELK1,FLI1,ETV4,ETV7,ERF,ELF5	SH2D2A,L3MBTL4
234	taipale-RCATTCCNNRCATWCCN-TEAD1-full	0.11719	3.83642	M13	TEAD1,TEAD3,TEAD4,TEAD2	NLRP3
235	transfac_pro-M02345	0.11719	3.83642	M95		NLRP3
236	encode-UW.Motif.0667	0.116592	3.81557	M65		SH2D2A
237	swissregulon-NFE2L1.p2	0.116293	3.80515	M72	NFE2L1	NLRP3
238	flyfactorsurvey-Atf-2_SANGER_5_FBgn0050420	0.115695	3.7843	M3	NPDC1,JDP2,XBP1,JUND,JUN,JUNB,ATF7,BATF3,CREB3,ATF1	NLRP3,CHI3L2,PLCG2
239	transfac_pro-M01142	0.115695	3.7843	M20	NR5A2	PLCG2,L3MBTL4,CHI3L2
240	yetfasco-1548	0.115097	3.76345	M90		L3MBTL4
241	yetfasco-2066	0.115097	3.76345	M93		PLCG2
242	encode-UW.Motif.0391	0.114798	3.75302	M96		NLRP3
243	hdpi-MRPS25	0.114499	3.74259	M85	MRPS25	PLCG2
244	homer-M00159	0.114499	3.74259	M32	IRF4,SPI1,ETS1,PURA,GABPB1	PLCG2
245	jaspar-MA0305.1	0.114499	3.74259	M32		L3MBTL4
246	transfac_pro-M02312	0.114499	3.74259	M75	OTP,HOXB6,LHX5,HOXA6,HOXB7,HOXA7,LHX3,PHOX2B,LMX1B,ALX1,PROP1,POU3F2,HOXB4,VSX1,LHX1,LMX1A,SHOX2,VAX1,HOXC5,NKX6-1,HOXC4,POU2F1,PAX6,HOXA4,ESX1,PHOX2A,TLX2,POU1F1,LHX6,HOXC6,MNX1,RHOXF2,RHOXF2B,NKX6-3	L3MBTL4
247	homer-M01799	0.1142	3.73217	M16		L3MBTL4
248	transfac_pro-M00944	0.1142	3.73217	M1	USF1,USF2,MAX,MYC,ATF3,TFE3,CREB3L2	NLRP3,PLCG2
249	homer-M00356	0.113901	3.72174	M43		NLRP3
250	taipale-AAAAGTCAA-Nr2e1-DBD	0.113901	3.72174	M61	NR2E1	L3MBTL4
251	elemento-ACGTGGC	0.113303	3.70089	M19	CREB3L1	NLRP3
252	yetfasco-606	0.113303	3.70089	M32		L3MBTL4
253	taipale-NNTAATCCGMTTANN-OTX2-DBD	0.113004	3.69047	M54	OTX2,OTX1,ISL1,PITX3,CRX,PAX7,PITX2	L3MBTL4
254	taipale-NTTRCGCAAY-CEBPD-DBD	0.112706	3.68004	M46	CEBPD,CEBPE,CEBPB,CEBPG	NLRP3
255	taipale-SAAGGTCANNTSAAGGTCA-ESRRA-DBD	0.112706	3.68004	M72	ESRRA,ESRRG,RARG,RARA,RORA,NR5A2,NR5A1,ESRRB,NR6A1,RXRA	SH2D2A
256	transfac_pro-M01544	0.111809	3.64877	M96		NLRP3
257	yetfasco-1261	0.111809	3.64877	M40		PLCG2
258	yetfasco-841	0.111809	3.64877	M96		NLRP3
259	tfdimers-MD00249	0.11151	3.63834	M53	MAFA,ETS1	L3MBTL4
260	transfac_pro-M00388	0.111211	3.62792	M7		PLCG2
261	transfac_pro-M00694	0.111211	3.62792	M3	E4F1,ATF2	NLRP3
262	transfac_pro-M02929	0.111211	3.62792	M2	ZBTB3	NLRP3,CHI3L2
263	transfac_pro-M00372	0.110912	3.61749	M1		NLRP3,PLCG2
264	yetfasco-1282	0.110613	3.60707	M29	SREBF1,SREBF2,TFEB,USF1,TFE3,BHLHE40,MLXIPL,USF2,ARNT,MLX,BHLHE41,TFEC,ATF3,MYC,MAX,ARNT2,MXI1,ARNTL,HELT	PLCG2
265	yetfasco-1306	0.110613	3.60707	M29	SREBF2,SREBF1,TFEB,USF1,TFE3,BHLHE40,USF2,MLXIPL,ARNT,MLX,BHLHE41,TFEC,ATF3,MYC,MAX,ARNT2,MXI1,ARNTL,HELT	PLCG2
266	flyfactorsurvey-CG8319_SOLEXA_2.5_FBgn0037722	0.110015	3.58621	M73	ZNF146,ZNF260	L3MBTL4,PLCG2,NLRP3
267	taipale-RCGGACACAATR-FOXG1-DBD	0.110015	3.58621	M97	FOXG1,FOXK1	NLRP3
268	yetfasco-1194	0.110015	3.58621	M64		L3MBTL4
269	transfac_pro-M00311	0.109716	3.57579	M45		L3MBTL4
270	yetfasco-2084	0.109716	3.57579	M3		NLRP3
271	stark-YGATAC	0.109118	3.55494	M62	SIX1,SIX2	PLCG2
272	tfdimers-MD00252	0.109118	3.55494	M21	FLI1,VDR,BPTF,ETS1,ELF5,ZBTB14,ETS2,OVOL2,CBFB,ELF1,RUNX2,ELF2,ERF,ELK1,ERG,ELK4,ETV7	L3MBTL4,CHI3L2,PLCG2,NLRP3
273	tfdimers-MD00438	0.108819	3.54451	M14	E2F1	L3MBTL4
274	jaspar-PF0011.1	0.108221	3.52366	M27	GABPB1,ELK4,GABPA,ELK1,FLI1,ETV6	PLCG2
275	transfac_pro-M03065	0.108221	3.52366	M53	PITX1,PITX3,OTX1,OTX2,PITX2,HNF1A,IKZF2,CRX	L3MBTL4
276	yetfasco-1123	0.108221	3.52366	M98		NLRP3
277	transfac_pro-M01379	0.107922	3.51324	M82	HNF1A,HNF1B,VAX1	PLCG2
278	elemento-ATGCTGG	0.107623	3.50281	M99		L3MBTL4
279	transfac_pro-M00724	0.107623	3.50281	M15	FOXA1,SMAD1,FOXA3,FOXA2,PGR,NR3C1,FOXP3,GATA5,GATA1,GATA2,GATA4,GATA3,GATA6,FOXJ2,FOXI1,IRF1,FOXJ1,FOXF2,FOXF1,FOXH1,RRN3,FOXD3,RUNX3,FOXO1,FOXO4,NANOG	PLCG2
280	transfac_public-M00070	0.107324	3.49239	M11	TAL1,TCF4,TCF3,YY1,MYB,NEUROD1,ATOH1,TCF12,OLIG2,ZNF146,ZNF260	SH2D2A,L3MBTL4
281	transfac_public-M00063	0.107025	3.48196	M14	IRF2,IRF1,IRF7	L3MBTL4,NLRP3
282	transfac_public-M00275	0.107025	3.48196	M59		SH2D2A
283	homer-M01829	0.106726	3.47154	M35		PLCG2
284	taipale-NTTRCGCAAY-Cebpb-DBD	0.106726	3.47154	M46	CEBPD,CEBPB,CEBPE,CEBPG	NLRP3
285	transfac_public-M00285	0.106428	3.46111	M72	NFE2L1,TFAP4,RUNX2,CBFB,MYB	NLRP3
286	taipale-NTTRCGCAAY-CEBPB-full	0.106129	3.45069	M46	CEBPB,CEBPG,CEBPD,CEBPE	NLRP3
287	elemento-AAGGACG	0.105531	3.42983	M100		L3MBTL4
288	swissregulon-GTF2A1-2.p2	0.105531	3.42983	M5	GTF2A1,GTF2A2	L3MBTL4
289	yetfasco-2021	0.105531	3.42983	M98		L3MBTL4,NLRP3,CHI3L2,PLCG2
290	elemento-TAATTAA	0.105232	3.41941	M75	LHX5,OTP,LHX3,POU3F2,PROP1,VSX1,ALX1,NKX6-1,LMX1B,LHX1,PHOX2B,LMX1A,HOXB4,VAX1,HOXC4,SHOX2,TLX2,POU1F1,HOXC5,HOXC6,NKX6-3	L3MBTL4
291	homer-M00152	0.105232	3.41941	M47	PDX1,HOXB4,HOXA2	PLCG2
292	hdpi-ARNTL	0.104335	3.38813	M101	ARNTL	L3MBTL4
293	homer-M00862	0.104335	3.38813	M94		L3MBTL4,CHI3L2,NLRP3
294	homer-M01840	0.104036	3.37771	M88		NLRP3,PLCG2
295	transfac_pro-M02042	0.104036	3.37771	M32	SPIC,SPI1,EHF,SPIB,FLI1,ETV6,ELF3,ELF5,ETV2,ETV1,ETS1,ETV4,ETV3,ETV5,ELK1,GABPB1,FEV,ERF,GABPA,ERG,ELK4,ELK3,ETS2,ELF4,ELF1,ETV7,ELF2,NFATC3	SH2D2A,L3MBTL4,PLCG2
296	tfdimers-MD00250	0.103737	3.36728	M7	GATA6,GATA1,GATA2,GATA4,GATA5,YY1,GATA3,PAX4,MYCN,SMAD4,ING4,PAX7,LMO2,NR3C1,ELK1,RORB,RORC,RORA	L3MBTL4
297	transfac_pro-M02235	0.103737	3.36728	M3		NLRP3
298	elemento-CATCGTC	0.103438	3.35686	M102		L3MBTL4
299	jaspar-MA0142.1	0.103139	3.34643	M12	POU5F1,POU5F1B,SOX2,NANOG,NFATC1,PAX4,TCF3,YY1,PDX1,POU2F2,POU2F1,PBX1,HOXD1,E2F1,POU2F3,POU3F1,CDX2,SOX9,SRY	PLCG2
300	transfac_pro-M01630	0.10284	3.33601	M15	FOXO4,FOXO1,FOXO3,FOXM1,FOXO6,FOXJ2	L3MBTL4,PLCG2
301	transfac_pro-M01729	0.10284	3.33601	M32		L3MBTL4,PLCG2,SH2D2A
302	yetfasco-1292	0.10284	3.33601	M103	HSF1,HSF2,HSF4	L3MBTL4
303	encode-UW.Motif.0476	0.102541	3.32558	M56		L3MBTL4
304	hdpi-CREB3L1	0.102541	3.32558	M104	CREB3L1	NLRP3
305	elemento-GGTCACC	0.101943	3.30473	M73		L3MBTL4
306	flyfactorsurvey-sug_SANGER_5_FBgn0033782	0.101644	3.29431	M90	GLIS2,GLIS3,ZIC4,ZIC3,ZIC1,ZIC2,ZIC5	PLCG2
307	transfac_public-M00220	0.101046	3.27345	M29	SREBF1,SREBF2,ARNT,TFEC,MLX,MLXIPL,TFEB,USF1,TFE3,ATF3,BHLHE41,BHLHE40,USF2,HELT	NLRP3
308	elemento-GCTGCGC	0.100149	3.24218	M105		PLCG2
309	hdpi-ZNF720	0.100149	3.24218	M101	ZNF720	L3MBTL4,PLCG2
310	taipale-TGACAGSTGTCA-TGIF2-DBD	0.100149	3.24218	M95	TGIF2,TGIF2LX,MEIS2,TGIF1,PKNOX1,MEIS3,PKNOX2	L3MBTL4,NLRP3,PLCG2
311	transfac_pro-M00916	0.100149	3.24218	M3	CREB1,CREM,ATF2,ATF4,ATF3,ATF5,ATF6,ATF1,ATF7,CREB3,XBP1,JUNB,JUND,JUN,JDP2,E4F1	NLRP3
312	transfac_pro-M01854	0.0998505	3.23175	M104	RUNX3	NLRP3
313	encode-UW.Motif.0521	0.0995516	3.22133	M7		L3MBTL4,PLCG2,NLRP3
314	taipale-NTAATTANNNTAATTAN-MEOX2-DBD	0.0992526	3.2109	M50	MEOX2,LHX2,PDX1,NKX6-1,NKX6-2,HOXA1,EMX1,EMX2,HOXA2,HOXA3,EVX2,HOXB2,VAX2,EN1,IRF6,HOXA5,EVX1,MEOX1,LMX1B,HOXB3,HOXC6,LHX1,LHX5	L3MBTL4
315	taipale-RTAAACAWMAACA-FOXJ2-DBD	0.0992526	3.2109	M39	FOXJ2,FOXJ3,FOXO4,FOXO6,FOXD2,FOXI1,FOXP3,FOXO3,FOXL1	L3MBTL4,PLCG2
316	yetfasco-2020	0.0989537	3.20048	M98		L3MBTL4,CHI3L2,NLRP3,PLCG2
317	yetfasco-397	0.0989537	3.20048	M29	MLXIPL,MLX,SREBF2,TFEC,ARNT,TFEB,USF1,SREBF1,TFE3,BHLHE41,ATF3,BHLHE40,ARNTL,USF2,HELT	NLRP3,PLCG2
318	yetfasco-1898	0.0983558	3.17963	M35		NLRP3,L3MBTL4
319	taipale-ATCACGTGAT-MLX-full	0.0977578	3.15878	M29	MLX,MLXIPL,SREBF2,TFEB,SREBF1,TFEC,USF1,ARNT,TFE3,BHLHE40,BHLHE41,ATF3,USF2,ARNTL,HELT	PLCG2,NLRP3
320	tfdimers-MD00053	0.0977578	3.15878	M106	ZNF354C,TCF3	L3MBTL4
321	homer-M00843	0.0974589	3.14835	M19		PLCG2
322	taipale-NGGGGAWTCCCCN-NFKB2-DBD	0.0974589	3.14835	M107	NFKB2,NFKB1,MZF1,IKZF1,RELB	CHI3L2,PLCG2
323	transfac_pro-M01227	0.0971599	3.13793	M77	MAFB	NLRP3
324	yetfasco-1679	0.096562	3.11707	M108		L3MBTL4,NLRP3
325	yetfasco-604	0.096562	3.11707	M109		L3MBTL4
326	taipale-NTGACCTNATNAGGTCAN-THRB-DBD	0.0962631	3.10665	M83	THRB,THRA	PLCG2,L3MBTL4,SH2D2A,CHI3L2
327	transfac_pro-M01164	0.0959641	3.09622	M60	MEF2C,MEF2A	PLCG2
328	homer-M00295	0.0956652	3.0858	M15	FOXC2,FOXJ2,FOXA1,FOXA2,FOXA3,FOXL1,FOXI1,HLTF,FOXJ1,FOXF1,FOXF2,FOXD3,FOXH1,RRN3,PGR,NR3C1,NF1,FOXD2,HMGA1,FOXO1,HMGA2,FOXL2	PLCG2
329	transfac_pro-M01815	0.0953662	3.07537	M3	XBP1	NLRP3
330	yetfasco-1466	0.0953662	3.07537	M110		NLRP3
331	transfac_pro-M02326	0.0947683	3.05452	M75	LHX5,OTP,ALX1,HOXB4,PHOX2B,POU3F2,LHX1,VSX1,LHX3,LMX1B,PROP1,VAX1,HOXC5,SHOX2,HOXC4,PAX6,LMX1A,HOXA4,NKX6-1,PHOX2A,ESX1,POU2F1,HOXC6,RHOXF2,RHOXF2B,NKX6-3	L3MBTL4
332	yetfasco-1473	0.0947683	3.05452	M29	BHLHE40,TFEB,TFE3,TFEC,MLXIPL,USF1,ARNT,SREBF2,BHLHE41,SREBF1,MLX,USF2,ATF3,ARNTL,MAX,ARNT2,MYC,HELT	NLRP3,PLCG2
333	elemento-CATCATCA	0.0944694	3.0441	M102		L3MBTL4,NLRP3
334	hdpi-FOSL1	0.0944694	3.0441	M111	FOSL1	NLRP3,L3MBTL4,PLCG2
335	transfac_pro-M02785	0.0944694	3.0441	M11	OSR2,OSR1	L3MBTL4
336	tiffin-TIFDMEM0000046	0.0941704	3.03367	M78		NLRP3
337	transfac_public-M00260	0.0938715	3.02325	M46	HLF,TEF,DBP,NFIL3,ATF2	NLRP3
338	yetfasco-1023	0.0938715	3.02325	M31	ARNT,BHLHE40	NLRP3
339	encode-UW.Motif.0173	0.0935725	3.01282	M110		L3MBTL4
340	encode-UW.Motif.0635	0.0935725	3.01282	M7	JAZF1	PLCG2
341	homer-M00614	0.0935725	3.01282	M112	EMX2,EMX1	NLRP3
342	jaspar-PF0048.1	0.0935725	3.01282	M113		SH2D2A
343	tfdimers-MD00337	0.0935725	3.01282	M7	VDR,NANOG,SMAD1,TCF7L1,SOX2,QSOX1,SOX4,STAT1,TCF3,SOX11	PLCG2
344	transfac_pro-M02854	0.0935725	3.01282	M82	FOXJ1	NLRP3
345	tfdimers-MD00481	0.0932735	3.0024	M114	MZF1,OVOL2,EBF1	CHI3L2
346	transfac_pro-M02290	0.0932735	3.0024	M75	LHX5,ALX1,VSX1,POU3F2,PROP1,HOXB4,PHOX2B,LHX1,LMX1B,SHOX2,OTP,HOXC5,PAX6,VAX1,POU2F1,PHOX2A,LHX3,ESX1,PAX7,LHX6,LMX1A,HOXA4,CRX,NOBOX,HOXC4,RAX,MSX1,NKX6-1,RHOXF2B,RHOXF2,NKX6-3	L3MBTL4
# Rank	Track id	AUC	NES	ClusterCode	Transcription factor	Target genes
1	wgEncodeHaibTfbsGm12878Bcl3V0416101PkRep2.broadPeak.gz	0.377578	7.50827	T1	BCL3	CHI3L2,NLRP3
2	wgEncodeHaibTfbsGm12878Bcl3V0416101PkRep1.broadPeak.gz	0.373692	7.42743	T1	BCL3	CHI3L2,NLRP3
3	wgEncodeHaibTfbsGm12878Cebpbsc150V0422111PkRep2.broadPeak.gz	0.309118	6.0843	T2	CEBPB	CHI3L2,NLRP3
4	wgEncodeHaibTfbsGm12878Irf4sc6059Pcr1xPkRep1.broadPeak.gz	0.304634	5.99103	T3	IRF4	NLRP3,CHI3L2
5	wgEncodeHaibTfbsGm12878Atf2sc81188V0422111PkRep1.broadPeak.gz	0.284006	5.56197	T4	ATF2	CHI3L2,NLRP3
6	wgEncodeHaibTfbsGm12878BatfPcr1xPkRep1.broadPeak.gz	0.273842	5.35055	T5	BATF	NLRP3,CHI3L2
7	wgEncodeHaibTfbsGm12878Nficsc81335V0422111PkRep2.broadPeak.gz	0.258894	5.03964	T6	NFIC	CHI3L2,NLRP3
8	wgEncodeHaibTfbsGm12878Irf4sc6059Pcr1xPkRep2.broadPeak.gz	0.249626	4.84688	T3	IRF4	NLRP3,CHI3L2
9	wgEncodeHaibTfbsGm12878Mef2aPcr1xPkRep2.broadPeak.gz	0.206577	3.95146	T7	MEF2A	CHI3L2,NLRP3
10	wgEncodeHaibTfbsGm12878Mef2aPcr1xPkRep1.broadPeak.gz	0.203886	3.89549	T7	MEF2A	CHI3L2,NLRP3
11	wgEncodeHaibTfbsHepg2Rad21V0416101PkRep1.broadPeak.gz	0.199402	3.80222	T8	RAD21	CHI3L2
12	wgEncodeHaibTfbsGm12891Pol24h8Pcr1xPkRep1.broadPeak.gz	0.195815	3.7276	T9	POLR2A	CHI3L2
13	wgEncodeHaibTfbsH1hescMaxV0422111PkRep2.broadPeak.gz	0.193722	3.68407	T10	MAX	SH2D2A
14	wgEncodeSydhTfbsK562CmycIfng6hStdPk.narrowPeak.gz	0.192825	3.66542	T11	MYC	SH2D2A
15	wgEncodeSydhTfbsA549CmycIggrabPk.narrowPeak.gz	0.191629	3.64055	T11	MYC	SH2D2A
16	wgEncodeHaibTfbsK562Creb1sc240V0422111PkRep1.broadPeak.gz	0.189238	3.5908	T12	CREB1	NLRP3
17	wgEncodeSydhTfbsImr90Rad21IggrabPk.narrowPeak.gz	0.188939	3.58458	T8	RAD21	CHI3L2
18	wgEncodeHaibTfbsMcf7Gata3V0422111PkRep2.broadPeak.gz	0.182661	3.454	T13	GATA3	CHI3L2
19	wgEncodeHaibTfbsGm12878Atf2sc81188V0422111PkRep2.broadPeak.gz	0.180568	3.41047	T4	ATF2	CHI3L2
20	wgEncodeSydhTfbsGm10847NfkbTnfaIggrabPk.narrowPeak.gz	0.180568	3.41047	T14	NFKB1	L3MBTL4,CHI3L2,NLRP3
21	wgEncodeHaibTfbsMcf7Rad21V0422111PkRep2.broadPeak.gz	0.179671	3.39182	T8	RAD21	CHI3L2
22	wgEncodeSydhTfbsImr90CtcfbIggrabPk.narrowPeak.gz	0.179073	3.37938	T15	CTCF	CHI3L2
23	wgEncodeHaibTfbsHepg2Rad21V0416101PkRep2.broadPeak.gz	0.178475	3.36695	T8	RAD21	CHI3L2
24	wgEncodeHaibTfbsGm12878Nficsc81335V0422111PkRep1.broadPeak.gz	0.178176	3.36073	T6	NFIC	CHI3L2,NLRP3
25	wgEncodeSydhTfbsGm12878Usf2IggmusPk.narrowPeak.gz	0.17728	3.34207	T16	USF2	L3MBTL4,SH2D2A
26	wgEncodeSydhTfbsHepg2TbpIggrabPk.narrowPeak.gz	0.17728	3.34207	T17	TBP	L3MBTL4
27	wgEncodeSydhTfbsK562Brf2StdPk.narrowPeak.gz	0.176981	3.33585	T18	BRF2	CHI3L2
28	wgEncodeSydhTfbsHelas3Elk112771IggrabPk.narrowPeak.gz	0.171599	3.22393	T19	ELK1	PLCG2
29	wgEncodeHaibTfbsGm12878Foxm1sc502V0422111PkRep1.broadPeak.gz	0.168012	3.14931	T20	FOXM1	CHI3L2,NLRP3
30	wgEncodeSydhTfbsMcf10aesCfosTam112hHvdPk.narrowPeak.gz	0.166517	3.11822	T21	FOS	CHI3L2
31	wgEncodeHaibTfbsMcf7Tead4sc101184V0422111PkRep2.broadPeak.gz	0.166218	3.112	T22	TEAD4	CHI3L2,NLRP3
32	wgEncodeSydhTfbsK562CmycStdPk.narrowPeak.gz	0.164723	3.08091	T11	MYC	SH2D2A
33	wgEncodeHaibTfbsMcf7Tcf12V0422111PkRep2.broadPeak.gz	0.163827	3.06225	T23	TCF12	CHI3L2
34	wgEncodeHaibTfbsGm12878BatfPcr1xPkRep2.broadPeak.gz	0.162033	3.02494	T5	BATF	NLRP3,CHI3L2
35	wgEncodeHaibTfbsHct116Rad21V0422111PkRep2.broadPeak.gz	0.161734	3.01873	T8	RAD21	CHI3L2
36	wgEncodeSydhTfbsK562CmycIfna30StdPk.narrowPeak.gz	0.161136	3.00629	T11	MYC	SH2D2A
